# Supplementary material for: Epigenetic Regulation of Filaggrin Gene Expression in Human Epidermal Keratinocytes
Source: PubMed Central journal article supplement — Ann Dermatol. 2020 Mar 11;32(2):122–9. doi: 10.5021/ad.2020.32.2.122 (PMC7992546; doi:10.5021/ad.2020.32.2.122), 2020-03-11
Supplement: ad-32-122-s001.pdf [file ad-32-122-s001.pdf]

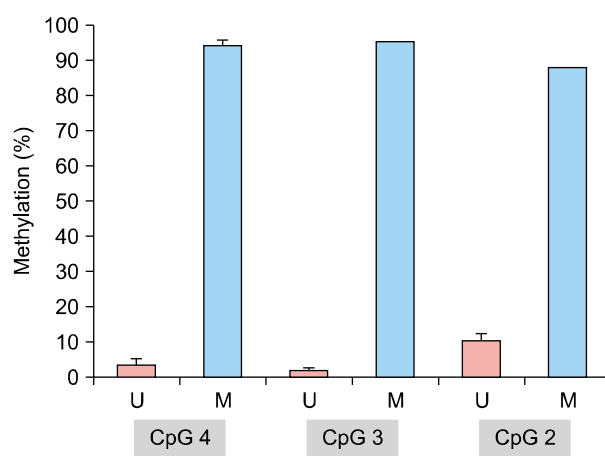

**Supplementary Fig. 1.** Quantitative methylation analysis of the unmethylated (U) and *in vitro* methylated (M) luciferase reporter plasmids. Three CpG dinucleotide units located in the filaggrin gene promoter were assessed by bisulfite pyrosequencing. Unmethylated and methylated CpG units are presented as white and black bars, respectively.
