# Supplementary material for: Epigenetic Regulation of Filaggrin Gene Expression in Human Epidermal Keratinocytes
Source: PubMed Central journal article supplement — Ann Dermatol. 2020 Mar 11;32(2):122–9. doi: 10.5021/ad.2020.32.2.122 (PMC7992546; doi:10.5021/ad.2020.32.2.122), 2020-03-11
Supplement: ad-32-122-s002.pdf [file ad-32-122-s002.pdf]

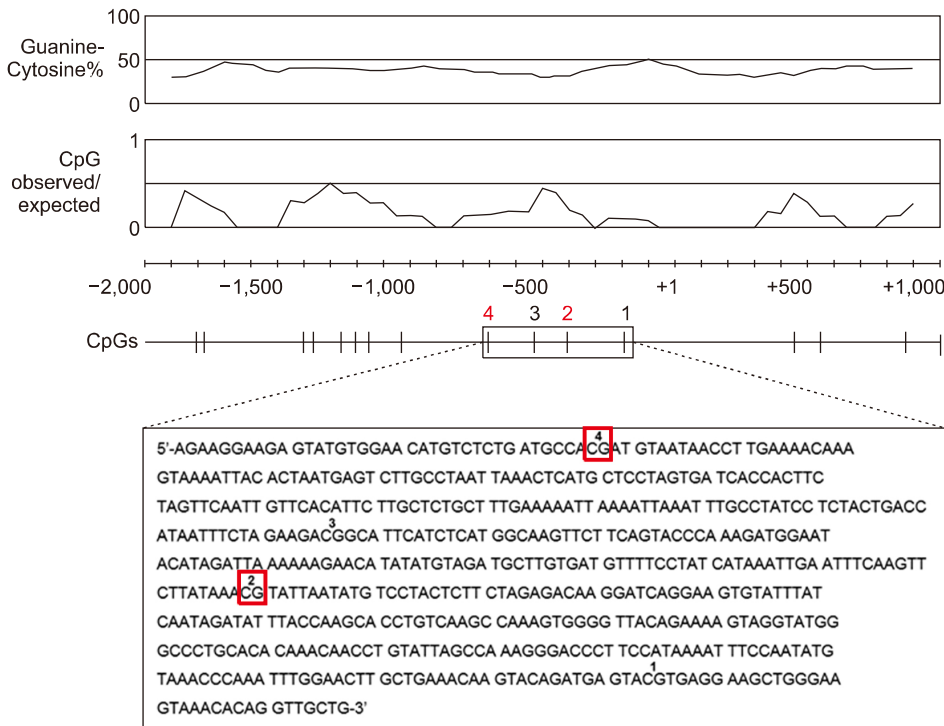

**Supplementary Fig. 2.** Plots of G+C nucleotide percentage (upper panel) and observed versus expected ratio of CpG dinucleotide frequency (lower panel) for the *FLC* 5'-end. Nucleotide sequence (GenBank accession No. NC\_000001.11) of the promoter region analyzed by bisulfite genomic sequencing and two key CpG sites (red box) analyzed by bisulfite pyrosequencing are indicated under the CpG island plot.
